# Supplementary material
Source: Hindawi journal article supplement (doi:10.1155/2011/827693)
Supplement: f1 [file 827693.f1.pdf]

# Supplementary Data

Table 1SD

Primers and temperatures applied for the DHPLC analysis of the genes of interest.

| Gene        | Exons     | Primers                                                                           | DHPLC temperature (°C) |
|-------------|-----------|-----------------------------------------------------------------------------------|------------------------|
| <b>FTL</b>  | 1         | forward: 5' GGCGCACCATAAAAAGAAGCC 3'<br>reverse: 5' TTGACCAGGCTGTTGACGGC 3'       | 64                     |
|             | 1         | forward: 5' TCGGCCATCTCCTGCTTCTG 3'<br>reverse: 5' CACCGCCCTCTGTTTACCCGA 3'       | 60                     |
|             | 2         | forward: 5' CGGGTAAACAGAGGGGCGGAG 3'<br>reverse: 5' CTCAATCTCCCAGAAGCCCACG 3'     | 64                     |
|             | 3         | forward: 5' TCTTTGTGGCCTGGGCCTC 3'<br>reverse: 5' GGAGAGAGCAGCCAGTTGCAG 3'        | 58                     |
|             | 4         | forward: 5' CAACTGGCTGCTCTCTCCCC 3'<br>reverse: 5' GAGGCTTAGGCAGAAGCCCT 3'        | 60                     |
| <b>FTH</b>  | 1         | forward: 5' ACAAGCGACCCGCAGGGCCA 3'<br>reverse: 5' GAGGTGGACGCGGTCGTCAT 3'        | 68                     |
|             | 1         | forward: 5' GCCGCCTCTCCTTAGTCGC 3'<br>reverse: 5' GCGGGAGAGCCCCGCGGT 3'           | 62                     |
|             | 2         | forward: 5' CCTCCCTGTAGATCGTCACAGC 3'<br>reverse: 5' GGCAAAAGCCCAGTGTATCATCAC 3'  | 58                     |
|             | 3         | forward: 5' TGGTGGTTAGAGATGATGGGCTTG 3'<br>reverse: 5' GTGGGCAGCTTTCCCAATCC 3'    | 58                     |
|             | 4         | forward: 5' GCCTTAGGGATTGGGAAAGCTG 3'<br>reverse: 5' CTTGGTGACCAGGGAAGTCACC 3'    | 58                     |
| <b>FTMT</b> | fragment1 | forward: 5' CTCAGTTTCCCCACTTCCAAGG 3'<br>reverse: 5' CAGCTTCTCCGCGTGCTCG 3'       | 60                     |
|             | fragment2 | forward: 5' TATTTCTTCACCAGTCCCGG 3'<br>reverse: 5' GCAGGAGACAGCTGACTTTGG 3'       | 59                     |
| <b>IRP2</b> | 1         | not analysed                                                                      | -                      |
|             | 2         | forward: 5' TTGGATAAAGCTAGTTTCCAGGT 3'<br>reverse: 5' CAGCTCAGCTTGACAAATGC 3'     | 54, 55, 56             |
|             | 3         | forward: 5' TCTAACTTTTGTCTATGGCATTT 3'<br>reverse: 5' CCACACCTACCCAAGAGTCTG 3'    | 53, 55, 58             |
|             | 4         | forward: 5' ATGAATGTAACTAGACAGGGATACTT 3'<br>reverse: 5' CCAATTAAGTTGCATGGCTGT 3' | 52, 55, 59             |
|             | 5         | forward: 5' AGATAGCGTTGCTAATGTG 3'<br>reverse: 5' CTTAACTGGAAAATAACCTGG 3'        | 53                     |
|             | 6         | forward: 5' AGAAAGAAACAAGGCAAGTCTTT 3'<br>reverse: 5' GGTAACAGGGGCGAGATTCTG 3'    | 53, 56                 |
|             | 7         | forward: 5' TATATACTAACATTTGTATTCTTA 3'<br>reverse: 5' TGTTCCTGACATCCTTACCCCAA 3' | 54                     |
|             | 8         | forward: 5' GAAGCCTGGGTTCAAGTGTC 3'<br>reverse: 5' GAACCCAAATCCCTGCTCTC 3'        | 56, 58                 |
|             | 9         | forward: 5' TTTTCAGACAATCGTTGCTAATC 3'<br>reverse: 5' TTTGCTTGAAAGTTGTTGTTTCA 3'  | 52, 58                 |
|             | 10        | forward: 5' CCTGGGCAACAAAGTGAAAC 3'<br>reverse: 5' GGCTGGTCTCAAACCTTTGAA 3'       | 57                     |
|             | 11        | forward: 5' CGAATATACTTACTCTGCTTTAG 3'                                            | 56, 58                 |

|    |       |                                                                                             |               |
|----|-------|---------------------------------------------------------------------------------------------|---------------|
|    |       | reverse: 5' CAAAGCGGGTTGAAAAACAC 3'                                                         |               |
|    | 12    | forward: 5' TCAAATGTCCGGTATCTGCT 3'<br>reverse: 5' TCATGCATCATCTAAGAAACAAA 3'               | 53, 55, 57    |
|    | 13    | forward: 5' GCTGTAATTTTAAATTTGTTG 3'<br>reverse: 5' GCACAAACAAGCAGCTTCAG 3'                 | 52, 53, 58    |
|    | 14    | forward: 5' TCAGTCACTTTTTTTTTGAAATG 3'<br>reverse: 5' AGGTGCAGAGTTTACAGA 3'                 | 57            |
|    | 15    | forward: 5' TTGGTTAATCTCGCCCTCAG 3'<br>reverse: 5' 15R AACGACTTCCATTGGGAAAA 3'              | 55, 59        |
|    | 16    | forward: 5' 16F TAAGCCTGAAGCACCTGTT 3'<br>reverse: 5' 16R<br>AAAAGAACACTGCAAATTGATTAAACT 3' | 52, 54, 58    |
|    | 17/18 | not analysed                                                                                | -             |
|    | 19/20 | not analysed                                                                                | -             |
|    | 21    | forward: 5' ACTTTCAGAAGTGATTAGAGG 3'<br>reverse: 5' TGAGTGCATAATCATATATTGA 3'               | 56            |
|    | 22    | not analysed                                                                                | -             |
| CP | 1     | forward: 5' CAGAGAAGCCTGGCAACCA 3'<br>reverse: 5' GATTGATTCAAGTGTCTTGGG 3'                  | 53, 55, 56    |
|    | 2     | forward: 5' TGTGCTCATTAATTTCTCTAATTA 3'<br>reverse: 5' AAATAGTTAAGAGCTGAATGGCAG 3'          | 56, 57        |
|    | 3     | forward: 5' CATCCCCAAGGATCACATAGTAG 3'<br>reverse: 5' AATCTCAGCACAGAAGACTTGAT 3'            | 54, 56, 58    |
|    | 4     | forward: 5' CATGCTAAAAGTTTAGTCTTGCT 3'<br>reverse: 5' GCTTTGTTATAAGGACCACAGAC 3'            | 54, 56, 57,58 |
|    | 5     | forward: 5' AGGTAACTCTCACTATATCAAGC 3'<br>reverse: 5' ACCTTTTTCAGCTGACTGCTAAT 3'            | 57, 59, 60    |
|    | 6     | forward: 5' CAGCTGTCTGCCCTAGTTTATAGT 3'<br>reverse: 5' AGTTCCTTTGTGCGGGGGAGAGC 3'           | 56, 58, 59    |
|    | 7     | forward: 5' GTGAATACCTGCTTTCTGTTCTA 3'<br>reverse: 5' ATTCTTTCTGAGGTTGATGTAGC 3'            | 58, 59        |
|    | 8     | forward: 5' GCTCCTAGTAGTTCTTGCCAGAG 3'<br>reverse: 5' GTGACCAGTACAGTGGGTTATTA 3'            | 56, 58, 59    |
|    | 9     | forward: 5' GAACTCAGAAGTGGGCTATTC 3'<br>reverse: 5' CAAATGATCATTTTCAAAGAGAT 3'              | 57, 60        |
|    | 10    | forward: 5' AGGAACCCTAGTTTACAAAGAGCAAC 3'<br>reverse: 5' AACCAGTGAGATTACCTTCAGGACAC 3'      | 55,56         |
|    | 11    | forward: 5' TAAAGCGTGGGCAAGCCTGAATAGGT3'<br>CP_11R AAGGGATAAGTTTATCACCCAACACA 3'            | 56, 57, 60    |
|    | 12    | forward: 5' TCACCTGAGGCCATGATAAGGACTTC 3'<br>reverse: 5' ACTTCTCTGAAAAGGAAACCTAAAAT 3'      | 58, 60        |
|    | 13    | not analysed                                                                                | -             |
|    | 14    | forward: 5' TGCTGATCTTTGCTTTTATTACTAAG 3'<br>reverse: 5' CACTTTCTTGGTCCAGACTCTCTATG 3'      | 58, 60, 61    |
|    | 15    | forward: 5' ACCAGATCCATTAACACTTGATGAAT 3'<br>reverse: 5' AGCAGCATAGTTGCTAAAGTAGATTG 3'      | 56, 57        |
|    | 16    | forward: 5' GGTGCAAAGTCTCAGTTCT 3'<br>reverse: 5' AAACAAATGAATGGTCTCCAAAATAA 3'             | 56, 57        |
|    | 17    | forward: 5' GCCTAGAAAAGCAATGTGATA 3'<br>reverse: 5' AACATTTTCAAACAGAGCAAG 3'                | 53, 59        |

|            |     |                                                                                        |            |
|------------|-----|----------------------------------------------------------------------------------------|------------|
|            | 18  | forward: 5' CCATTTGTATTAAACACAGAAACGAG 3'<br>reverse: 5' TTGATGCATCATATTGGGGGAAGTAT 3' | 54, 58     |
|            | 19  | forward: 5' AGCAGAAAAATATAAATGAATCAGGA 3'<br>reverse: 5' TGTACAAGTGTTCAGTCATGTATC 3'   | 52, 55     |
| <b>HPX</b> | 1+2 | forward: 5' CAACTGGTCACCCAGAGCTG 3'<br>reverse: 5' TGCAGAGACACAACCAGACAGA 3'           | 59,5 61,5  |
|            | 3+4 | forward: 5' TTACTTTGCCATCTCCCTACCTC 3'<br>reverse: 5' GTGTCGATTCCAGCCCTTTC 3'          | 59,3       |
|            | 5   | forward: 5' AGTATCTGGGGATGCACAGTCA 3'<br>reverse: 5' CTACTCCAGGTTCTTGGATTCCA 3'        | 58,2 60,2  |
|            | 6+7 | forward: 5' AAAGCACAAAGGAGGGCGT 3'<br>reverse: 5' AAAGAGATGTGAGAGCACATTGG 3'           | 60, 61,5   |
|            | 8+9 | forward: 5' GGCCCTAGAGCAACCTATGG 3'<br>reverse: 5' CAGACAGGTAGCAGAACAAGCTG 3'          | 58, 60, 61 |
|            | 10  | forward: 5' ACATGGAAGCCATGCTATGTTT 3'<br>reverse: 5' ATTATGAGGAACTAGGAGGTGGG 3'        | 60, 62     |
